# Supplementary material
Source: PubMed Central journal article supplement (PMC10448707)
Supplement: NIHMS1854410-supplement-supinfo.pdf [file NIHMS1854410-supplement-supinfo.pdf]

**Supplemental Table 1:** List of myeloma treatments included in study.

| Generic Name                                | Brand Name                        | CPT/HCPCS Procedural Code(s)                                                              | ICD 10 Procedure Codes |
|---------------------------------------------|-----------------------------------|-------------------------------------------------------------------------------------------|------------------------|
| BORTEZOMIB                                  | velcade, chemoobort, bortecad     | S0115, J9044, J9041, C9207                                                                |                        |
| BELANTAMAB                                  | blenrep                           | C9069, J9037                                                                              |                        |
| BENDAMUSTINE                                | Treanda                           | J9036, C9042, J9034, J9033, C9243                                                         |                        |
| CARFILZOMIB                                 | kyprolis                          | C9295, J9047                                                                              |                        |
| CARMUSTINE                                  | BiCNU                             | C9437                                                                                     |                        |
| CYCLOPHOSPHAMIDE                            | cytoxan, procytox, cycloblastin   | C9429, C9421, J8530, J9070, J9080, J9090, J9091, J9092, J9093, J9094, J9095, J9096, J9097 |                        |
| DARATUMUMAB (with or without HYALURONIDASE) | darzalex, darzalex faspro         | J9144, C9062                                                                              |                        |
| DOXORUBICIN                                 | adriamycin, caelyx, myocet, doxil | C9415, J9000, J9001, Q2048, Q2049, Q2050                                                  |                        |
| ELOTUZUMAB                                  | empliciti                         | C9477, J9176                                                                              |                        |
| ETOPOSIDE                                   | VP-16                             | J9182, C9425, C9414, J9181, J8560,                                                        |                        |
| IDECABTAGENE VICLEUCEL                      |                                   | Q2055                                                                                     | XW043K7                |
| ISATUXIMAB                                  | sarclisa                          | J9227                                                                                     |                        |
| IXAZOMIB                                    | ninlaro                           |                                                                                           |                        |
| LENALIDOMIDE                                | revlimid, linamide                |                                                                                           |                        |
| MELPHALAN                                   | alkeran, evomela, phelinun        | J9245, J9246, J8600                                                                       |                        |
| MELPHALAN FLUFENAMIDE or MELFLUFEN          |                                   | C9080                                                                                     |                        |
| PANOBINOSTAT                                | farydak                           |                                                                                           |                        |
| POMALIDOMIDE                                | pomalyst, imnovid                 |                                                                                           |                        |
| SELINEXOR                                   | xpovio                            |                                                                                           |                        |
| THALIDOMIDE                                 | contergan, thalomid, talidex      | J9370, J9371, J9375, J9380                                                                |                        |
| VINCRISTINE                                 | oncovin                           | J9370, J9371, J9375, J9380                                                                |                        |

**Supplemental Table 2:** Sensitivity, specificity, and positive predictive value (PPV) for identifying patients with multiple myeloma of algorithms incorporating different combinations of diagnostic codes, treatment codes, and the VA cancer registry.

| Algorithm               | Sensitivity (95% CI) | Specificity (95% CI) | PPV (95% CI)        |
|-------------------------|----------------------|----------------------|---------------------|
| Dx: 1 Tx: 0 Vacr: TRUE  | 0.707 (0.671-0.74)   | 0.878 (0.807-0.93)   | 0.971 (0.952-0.983) |
| Dx: 1 Tx: 0 Vacr: FALSE | 0.999 (0.992-1)      | 0.024 (0.005-0.07)   | 0.854 (0.828-0.877) |
| Dx: 1 Tx: 1 Vacr: TRUE  | 0.707 (0.671-0.74)   | 0.878 (0.807-0.93)   | 0.971 (0.952-0.983) |
| Dx: 1 Tx: 1 Vacr: FALSE | 0.999 (0.992-1)      | 0.024 (0.005-0.07)   | 0.854 (0.828-0.877) |
| Dx: 1 Tx: 2 Vacr: TRUE  | 0.681 (0.645-0.715)  | 0.886 (0.816-0.936)  | 0.972 (0.953-0.984) |
| Dx: 1 Tx: 2 Vacr: FALSE | 0.932 (0.91-0.949)   | 0.187 (0.122-0.267)  | 0.867 (0.841-0.891) |
| Dx: 1 Tx: 3 Vacr: TRUE  | 0.661 (0.625-0.696)  | 0.902 (0.836-0.949)  | 0.975 (0.956-0.987) |
| Dx: 1 Tx: 3 Vacr: FALSE | 0.886 (0.86-0.909)   | 0.317 (0.236-0.407)  | 0.881 (0.855-0.904) |
| Dx: 2 Tx: 0 Vacr: TRUE  | 0.704 (0.668-0.737)  | 0.878 (0.807-0.93)   | 0.971 (0.952-0.983) |
| Dx: 2 Tx: 0 Vacr: FALSE | 0.993 (0.983-0.998)  | 0.439 (0.35-0.531)   | 0.91 (0.887-0.929)  |
| Dx: 2 Tx: 1 Vacr: TRUE  | 0.704 (0.668-0.737)  | 0.878 (0.807-0.93)   | 0.971 (0.952-0.983) |
| Dx: 2 Tx: 1 Vacr: FALSE | 0.993 (0.983-0.998)  | 0.439 (0.35-0.531)   | 0.91 (0.887-0.929)  |
| Dx: 2 Tx: 2 Vacr: TRUE  | 0.681 (0.645-0.715)  | 0.886 (0.816-0.936)  | 0.972 (0.953-0.984) |
| Dx: 2 Tx: 2 Vacr: FALSE | 0.929 (0.907-0.947)  | 0.504 (0.412-0.595)  | 0.914 (0.891-0.934) |
| Dx: 2 Tx: 3 Vacr: TRUE  | 0.661 (0.625-0.696)  | 0.902 (0.836-0.949)  | 0.975 (0.956-0.987) |
| Dx: 2 Tx: 3 Vacr: FALSE | 0.885 (0.859-0.907)  | 0.585 (0.493-0.673)  | 0.924 (0.901-0.943) |
| Dx: 3 Tx: 0 Vacr: TRUE  | 0.699 (0.664-0.733)  | 0.878 (0.807-0.93)   | 0.97 (0.952-0.983)  |
| Dx: 3 Tx: 0 Vacr: FALSE | 0.986 (0.974-0.993)  | 0.593 (0.501-0.681)  | 0.933 (0.912-0.95)  |
| Dx: 3 Tx: 1 Vacr: TRUE  | 0.699 (0.664-0.733)  | 0.878 (0.807-0.93)   | 0.97 (0.952-0.983)  |
| Dx: 3 Tx: 1 Vacr: FALSE | 0.986 (0.974-0.993)  | 0.593 (0.501-0.681)  | 0.933 (0.912-0.95)  |
| Dx: 3 Tx: 2 Vacr: TRUE  | 0.678 (0.642-0.713)  | 0.886 (0.816-0.936)  | 0.971 (0.953-0.984) |
| Dx: 3 Tx: 2 Vacr: FALSE | 0.923 (0.901-0.942)  | 0.642 (0.551-0.727)  | 0.936 (0.916-0.953) |
| Dx: 3 Tx: 3 Vacr: TRUE  | 0.658 (0.622-0.693)  | 0.902 (0.836-0.949)  | 0.975 (0.956-0.987) |
| Dx: 3 Tx: 3 Vacr: FALSE | 0.88 (0.854-0.903)   | 0.707 (0.619-0.786)  | 0.945 (0.925-0.961) |

**Supplemental Table 3:** Sensitivity, specificity, and positive predictive value (PPV) for identifying patients with multiple myeloma who initiated treatment within VA of algorithms incorporating different combinations of diagnostic codes, treatment codes, and the VA cancer registry.

| Algorithm               | Sensitivity (95% CI) | Specificity (95% CI) | PPV (95% CI)        |
|-------------------------|----------------------|----------------------|---------------------|
| Dx: 1 Tx: 0 Vacr: TRUE  | 0.8 (0.762-0.834)    | 0.545 (0.471-0.617)  | 0.821 (0.784-0.854) |
| Dx: 1 Tx: 0 Vacr: FALSE | 0.998 (0.989-1)      | 0 (0-0.019)          | 0.723 (0.688-0.756) |
| Dx: 1 Tx: 1 Vacr: TRUE  | 0.8 (0.762-0.834)    | 0.545 (0.471-0.617)  | 0.821 (0.784-0.854) |
| Dx: 1 Tx: 1 Vacr: FALSE | 0.998 (0.989-1)      | 0 (0-0.019)          | 0.723 (0.688-0.756) |
| Dx: 1 Tx: 2 Vacr: TRUE  | 0.772 (0.733-0.808)  | 0.565 (0.492-0.637)  | 0.823 (0.785-0.857) |
| Dx: 1 Tx: 2 Vacr: FALSE | 0.96 (0.939-0.975)   | 0.147 (0.1-0.205)    | 0.747 (0.711-0.78)  |
| Dx: 1 Tx: 3 Vacr: TRUE  | 0.752 (0.712-0.789)  | 0.586 (0.513-0.657)  | 0.826 (0.788-0.86)  |
| Dx: 1 Tx: 3 Vacr: FALSE | 0.934 (0.909-0.954)  | 0.246 (0.187-0.313)  | 0.764 (0.729-0.797) |
| Dx: 2 Tx: 0 Vacr: TRUE  | 0.796 (0.758-0.83)   | 0.545 (0.471-0.617)  | 0.821 (0.784-0.854) |
| Dx: 2 Tx: 0 Vacr: FALSE | 0.992 (0.98-0.998)   | 0.005 (0-0.029)      | 0.723 (0.688-0.756) |
| Dx: 2 Tx: 1 Vacr: TRUE  | 0.796 (0.758-0.83)   | 0.545 (0.471-0.617)  | 0.821 (0.784-0.854) |
| Dx: 2 Tx: 1 Vacr: FALSE | 0.992 (0.98-0.998)   | 0.005 (0-0.029)      | 0.723 (0.688-0.756) |
| Dx: 2 Tx: 2 Vacr: TRUE  | 0.772 (0.733-0.808)  | 0.565 (0.492-0.637)  | 0.823 (0.785-0.857) |
| Dx: 2 Tx: 2 Vacr: FALSE | 0.958 (0.937-0.974)  | 0.152 (0.104-0.211)  | 0.747 (0.712-0.78)  |
| Dx: 2 Tx: 3 Vacr: TRUE  | 0.752 (0.712-0.789)  | 0.586 (0.513-0.657)  | 0.826 (0.788-0.86)  |
| Dx: 2 Tx: 3 Vacr: FALSE | 0.932 (0.906-0.952)  | 0.246 (0.187-0.313)  | 0.764 (0.728-0.797) |
| Dx: 3 Tx: 0 Vacr: TRUE  | 0.79 (0.752-0.825)   | 0.545 (0.471-0.617)  | 0.82 (0.782-0.853)  |
| Dx: 3 Tx: 0 Vacr: FALSE | 0.986 (0.971-0.994)  | 0.01 (0.001-0.037)   | 0.723 (0.688-0.756) |
| Dx: 3 Tx: 1 Vacr: TRUE  | 0.79 (0.752-0.825)   | 0.545 (0.471-0.617)  | 0.82 (0.782-0.853)  |
| Dx: 3 Tx: 1 Vacr: FALSE | 0.986 (0.971-0.994)  | 0.01 (0.001-0.037)   | 0.723 (0.688-0.756) |
| Dx: 3 Tx: 2 Vacr: TRUE  | 0.768 (0.728-0.804)  | 0.565 (0.492-0.637)  | 0.822 (0.785-0.856) |
| Dx: 3 Tx: 2 Vacr: FALSE | 0.954 (0.932-0.971)  | 0.157 (0.109-0.217)  | 0.748 (0.712-0.781) |
| Dx: 3 Tx: 3 Vacr: TRUE  | 0.748 (0.708-0.785)  | 0.586 (0.513-0.657)  | 0.826 (0.787-0.859) |
| Dx: 3 Tx: 3 Vacr: FALSE | 0.928 (0.902-0.949)  | 0.246 (0.187-0.313)  | 0.763 (0.727-0.796) |
